# Supplementary material for: Flood Frequency Analysis Using the Gamma Family Probability Distributions
Source: Preprints.org preprint supplement (doi:10.20944/preprints202303.0320.v1), 2023-03-17
Supplement: Supplementary file 3 [file supplementary]

The raw and central moments of the analysed distributions were determined using the following methodology presented below, by substitution using the probability density function.

**1. Pearson III distribution**

To determine the raw moments of the Pearson III distribution, the following substitutions in the expression for the probability density function are required:

It is noted:

The cumulative function is obtained as:

Checking the condition that the integral is 1:

Thus, the first six raw moments are:

The characteristic moment of order *r* of the Pearson III distribution has the following expression:

The first six central moments (except the arithmetic mean) have the following expressions:

Skewness (), kurtosis (), and are determined with the following expressions:

**2. KRITKY-MENKEL distribution**

To determine the raw moments of the *KRITKY-MENKEL* distribution, the following substitutions in the expression for the probability density function are required:

It is noted:

The cumulative function is obtained as:

Checking the condition that the integral is 1:

Thus, the first six raw moments are:

The characteristic moment of order *r* of the KRITKY-MENKEL distribution has the following expression:

For r=1 result the arithmetic mean (expected value).

For the calculation of central moments, the same equivalence relations between central and raw moments are applied, following Pearson III.
